# Supplementary material
Source: publisher figshare collection journal article supplement (https://acs.figshare.com/ndownloader/files/5104999)
Supplement: Supplementary file 1 [file 5104999]

**Molecular Grafting to Silicon Surfaces in Air Using Organic Triazenes  
as Stable Diazonium Sources and HF as a Constant Hydride-Passivation  
Source—Supporting Information**

Bo Chen, Austen K. Flatt, Huahua Jian, Jared L. Hudson and James M.

Tour\*

Rice University, Department of Chemistry, Department of Mechanical Engineering and  
Materials Science, and Center for Nanoscale Science and Technology, MS-222, 6100

Main St., Houston, Texas 77005

tour@rice.edu

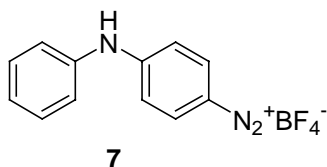

**4-Phenylamino-benzenediazonium Tetrafluoroborate (7).** To a 250 mL round bottom flask was added *N*-phenyl-*p*-phenylenediamine (1.00 g, 5.43 mmol). THF (30 mL) was added and cooled to -50°C. Borontrifluoride etherate (2.75 mL, 21.72 mmol) was added dropwise, followed by the dropwise addition of *tert*-butylnitrite (0.86 mL, 6.52 mmol) in THF (5 mL). The reaction was allowed to warm to -10 °C at which point Et<sub>2</sub>O (150 mL) was added. The suspension was allowed to stir for 10 min. The precipitated solid was collected by vacuum filtration to afford a mixture of **7** and the *N*-nitroso adduct. The collected solid was dissolved in a minimum of CH<sub>3</sub>CN (10 mL) and Et<sub>2</sub>O (150 mL) was

added. The green solid was collected by vacuum filtration to afford the title compound as a light green solid (0.31 g, 20%).  $^1\text{H}$  NMR (400 MHz,  $\text{CD}_3\text{CN}$ )  $\delta$  8.80 (s, 1H), 8.06 (d,  $J = 10.6$  Hz, 2H), 7.49 (t,  $J = 8.1$  Hz, 2H), 7.34 (m, 3H), 7.10 (d,  $J = 10.6$  Hz, 2H).  $^{13}\text{C}$  NMR (100 MHz,  $\text{CD}_3\text{CN}$ )  $\delta$  156.5, 137.3, 135.3, 130.5, 127.8, 124.5, 116.2, 92.6.
